# Supplementary material for: Model Senescent Microglia Induce Disease Related Changes in α-Synuclein Expression and Activity
Source: PubMed Central journal article supplement (PMC6164966; doi:10.3390/biom8030067), 2018-08-01
Supplement: biomolecules-08-00067-s001.pdf [file biomolecules-08-00067-s001.pdf]

Supplementary Data

## Model Senescent Microglia Induce Disease Related Changes in Alpha-synuclein Expression and Activity.

Dafina M. Angelova and David R. Brown

Department of Biology and Biochemistry, University of Bath, BA2 7AY, Bath, UK.

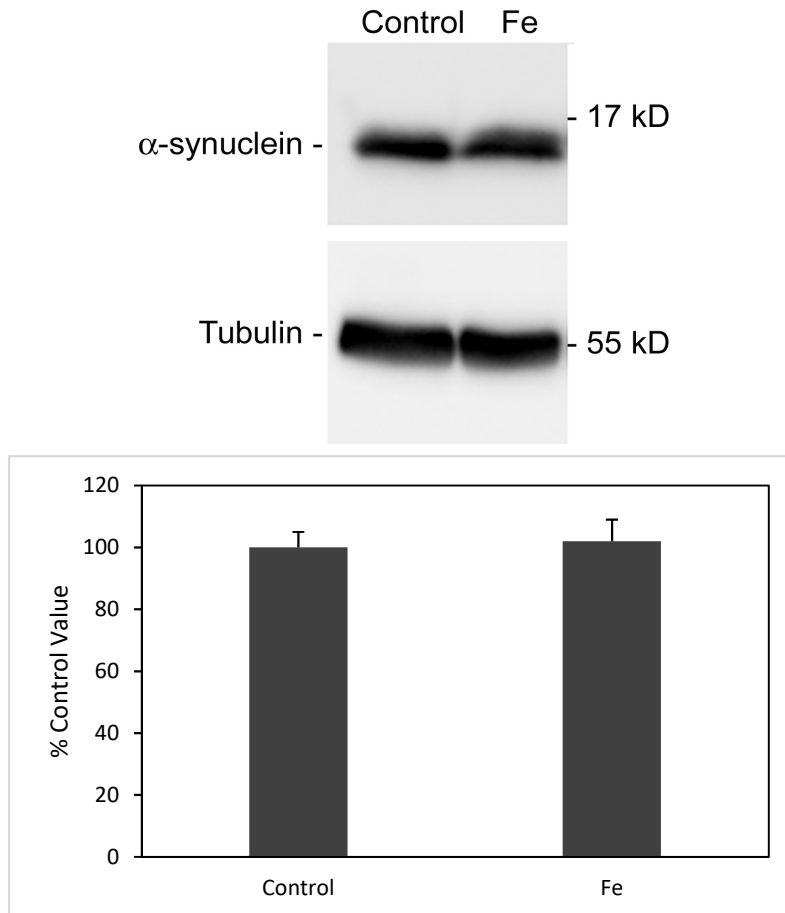

**Supplementary Figure 1** Iron and  $\alpha$ -synuclein expression.

SH-SY5Y cells were grown in serum free medium for 24 h. Control cells were grown only in the serum free medium while iron treated cells (Fe) were grown in 50  $\mu$ M ferric ammonium citrate. After 24 h the cells were harvested, and protein extracted. Equal amounts of protein were eletrophoresed on a 14% PAGEgel. After semi-dry transfer to a membrane  $\alpha$ -syn was detected with a specific antibody (MJFR1) and bands detected with chemiluminescence. The detected bands were quantitated densitometrically. The process was repeated after stripping the blot and tubulin was detected with a monoclonal antibody. Treatment with iron had no effect on the levels  $\alpha$ -syn detected. Shown are the mean and S.E.M for four experiments.

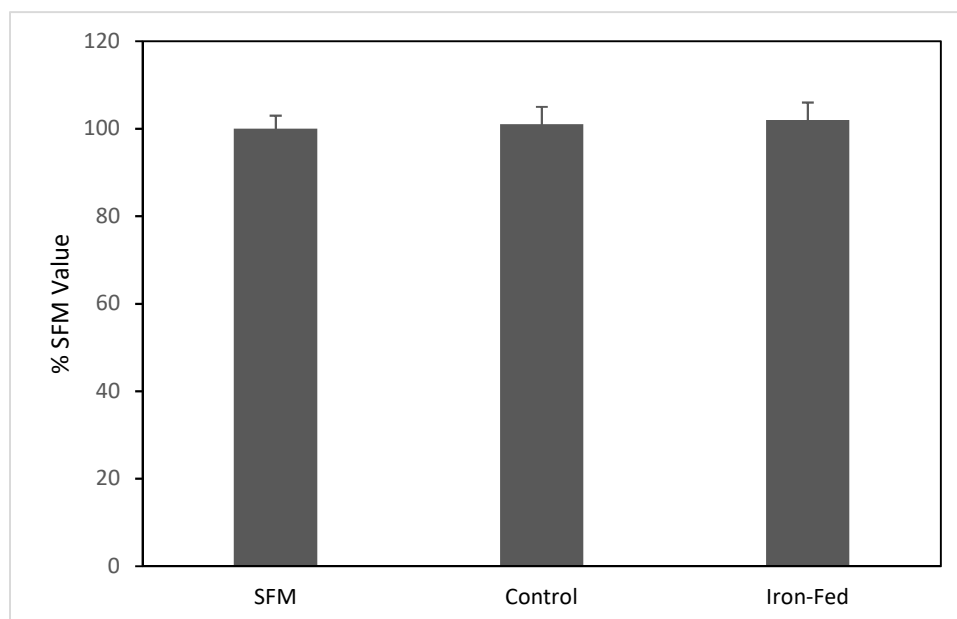

**Supplementary Figure 2:** Toxicity of conditioned medium.

The toxicity of conditioned medium from C8B4 microglia was tested on SH-SY5Y cells. The cells were treated for 24 h with either serum free medium (SFM), conditioned medium from control microglia (Control) or iron-fed microglia (Iron-Fed). The survival after 24 h was determined using an MTT viability assay. Neither the medium from control microglia nor iron-fed microglia had any significant ( $p > 0.05$ ) effect on SH-SY5Y cell viability when compared to SFM. Shown are the mean and S.E.M for four separate experiments with three replicates each.

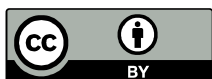

© 2018 by the authors. Submitted for possible open access publication under the terms and conditions of the Creative Commons Attribution (CC BY) license (<http://creativecommons.org/licenses/by/4.0/>).
